# Supplementary material
Source: ML conference proceedings conference paper supplement (https://openreview.net/forum?id=aYd4wSCle4)
Supplement: supplementary_material [file empirical_models_eq_selection.pdf › save/figs/empirical_models_eq_selection.pdf]

↑  $\sigma$  = ↓ Price Sensitivity

$H/L$  = Ratio of High to Low Price

Firm 1 Model

$H/L = 1.5, \sigma = 0.3$   
LR RF

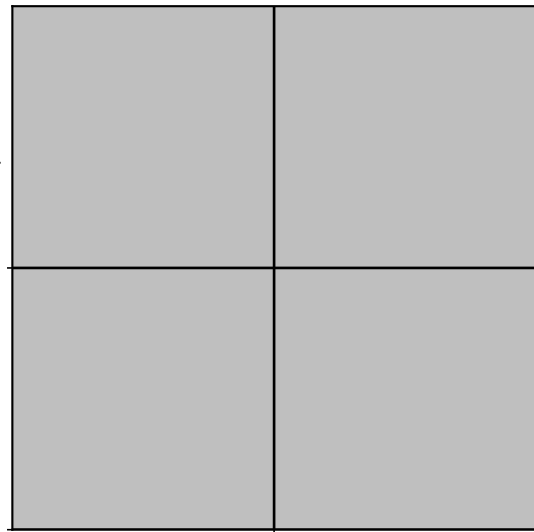

$H/L = 3, \sigma = 0.3$   
LR RF

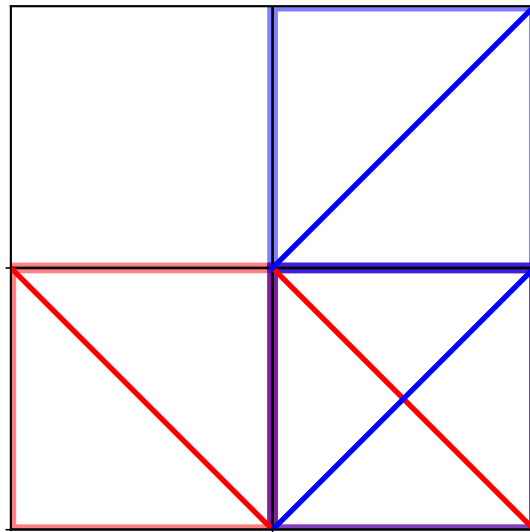

$H/L = 7, \sigma = 0.1$   
LR RF

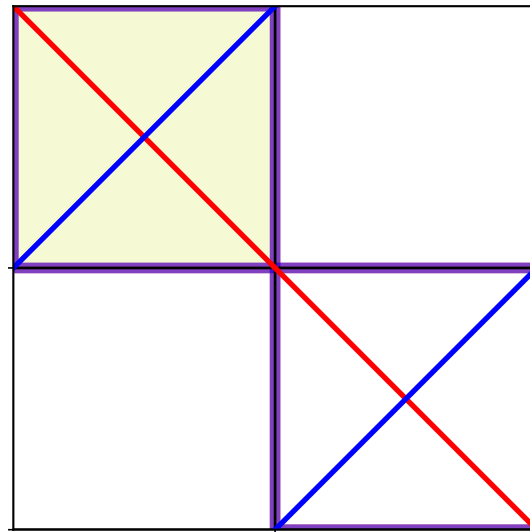

$H/L = 10, \sigma = 0.2$   
LR RF

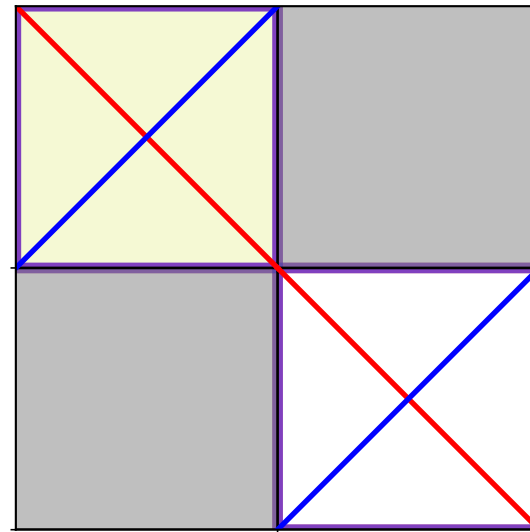

$H/L = 10, \sigma = 0.3$   
LR RF

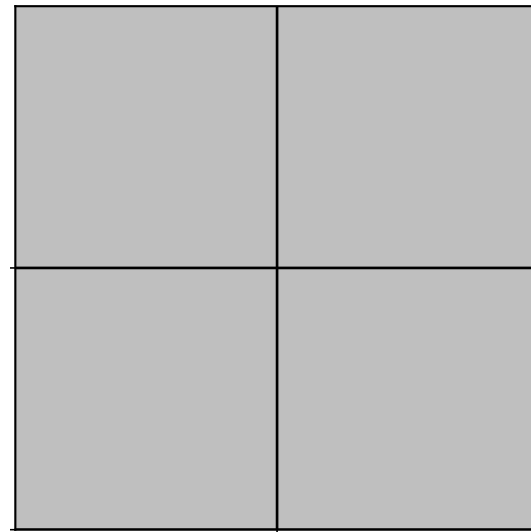

Firm 2 Model
