# Supplementary material
Source: ML conference proceedings conference paper supplement (https://openreview.net/forum?id=aYd4wSCle4)
Supplement: supplementary_material [file first_stage_game.pdf › save/figs/first_stage_game.pdf]

Perf. of independent  
model ( $a_i$ )

↑  $\sigma$  = ↓ Price Sensitivity

$\rho_c$  = Corr. of two correlated models

$\sigma = 0.1, \rho_c = 1$

$\sigma = 0.1, \rho_c = 0.5$

$\sigma = 0.3, \rho_c = 1$

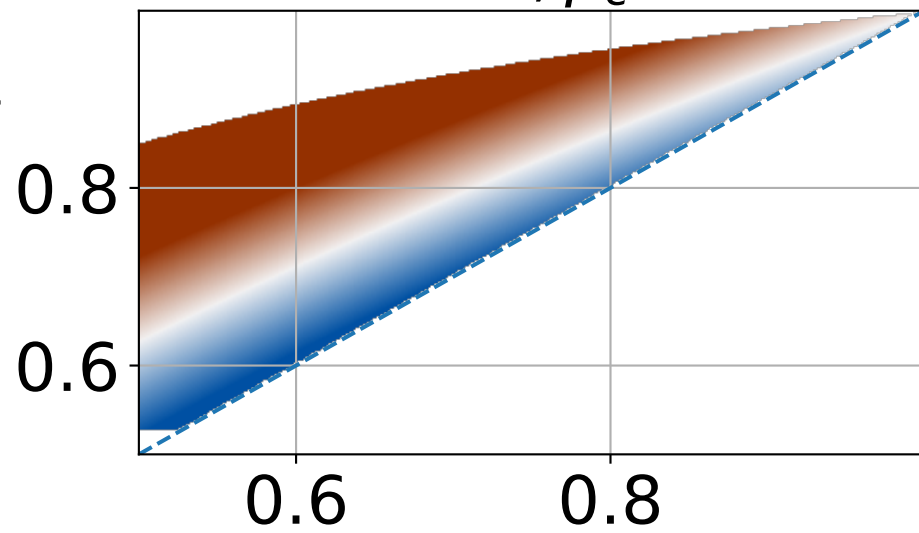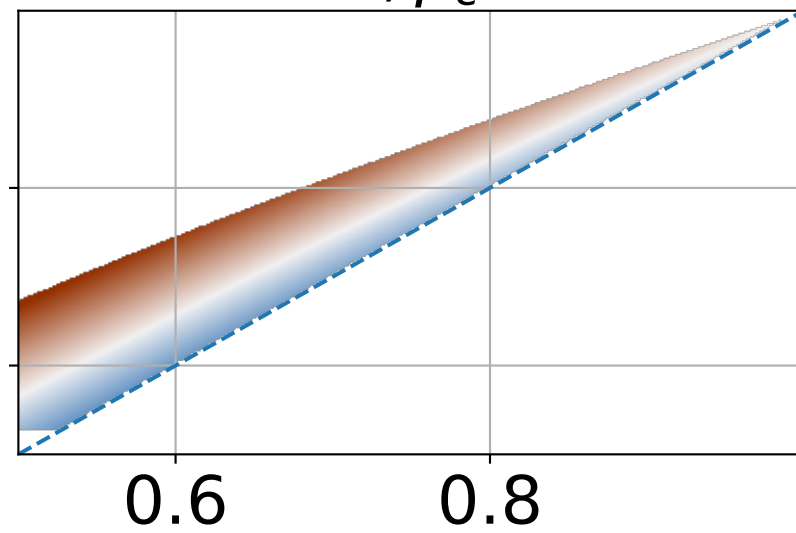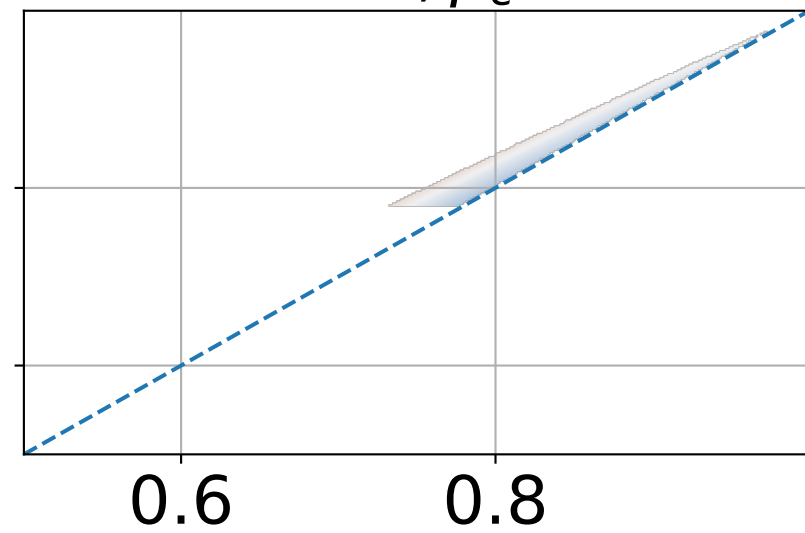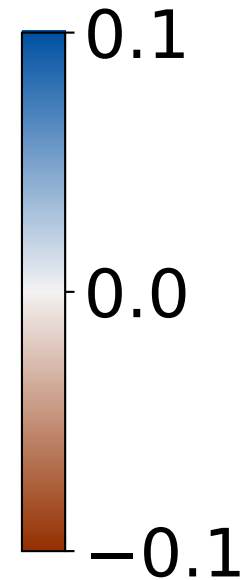

Performance of correlated model ( $a_c$ )
