# Supplementary material
Source: ML conference proceedings conference paper supplement (https://openreview.net/forum?id=aYd4wSCle4)

$\uparrow \sigma = \downarrow$  Price Sensitivity

$H/L$  = Ratio of High to Low Price

$\theta$  = % Population Willing to Pay  $H$

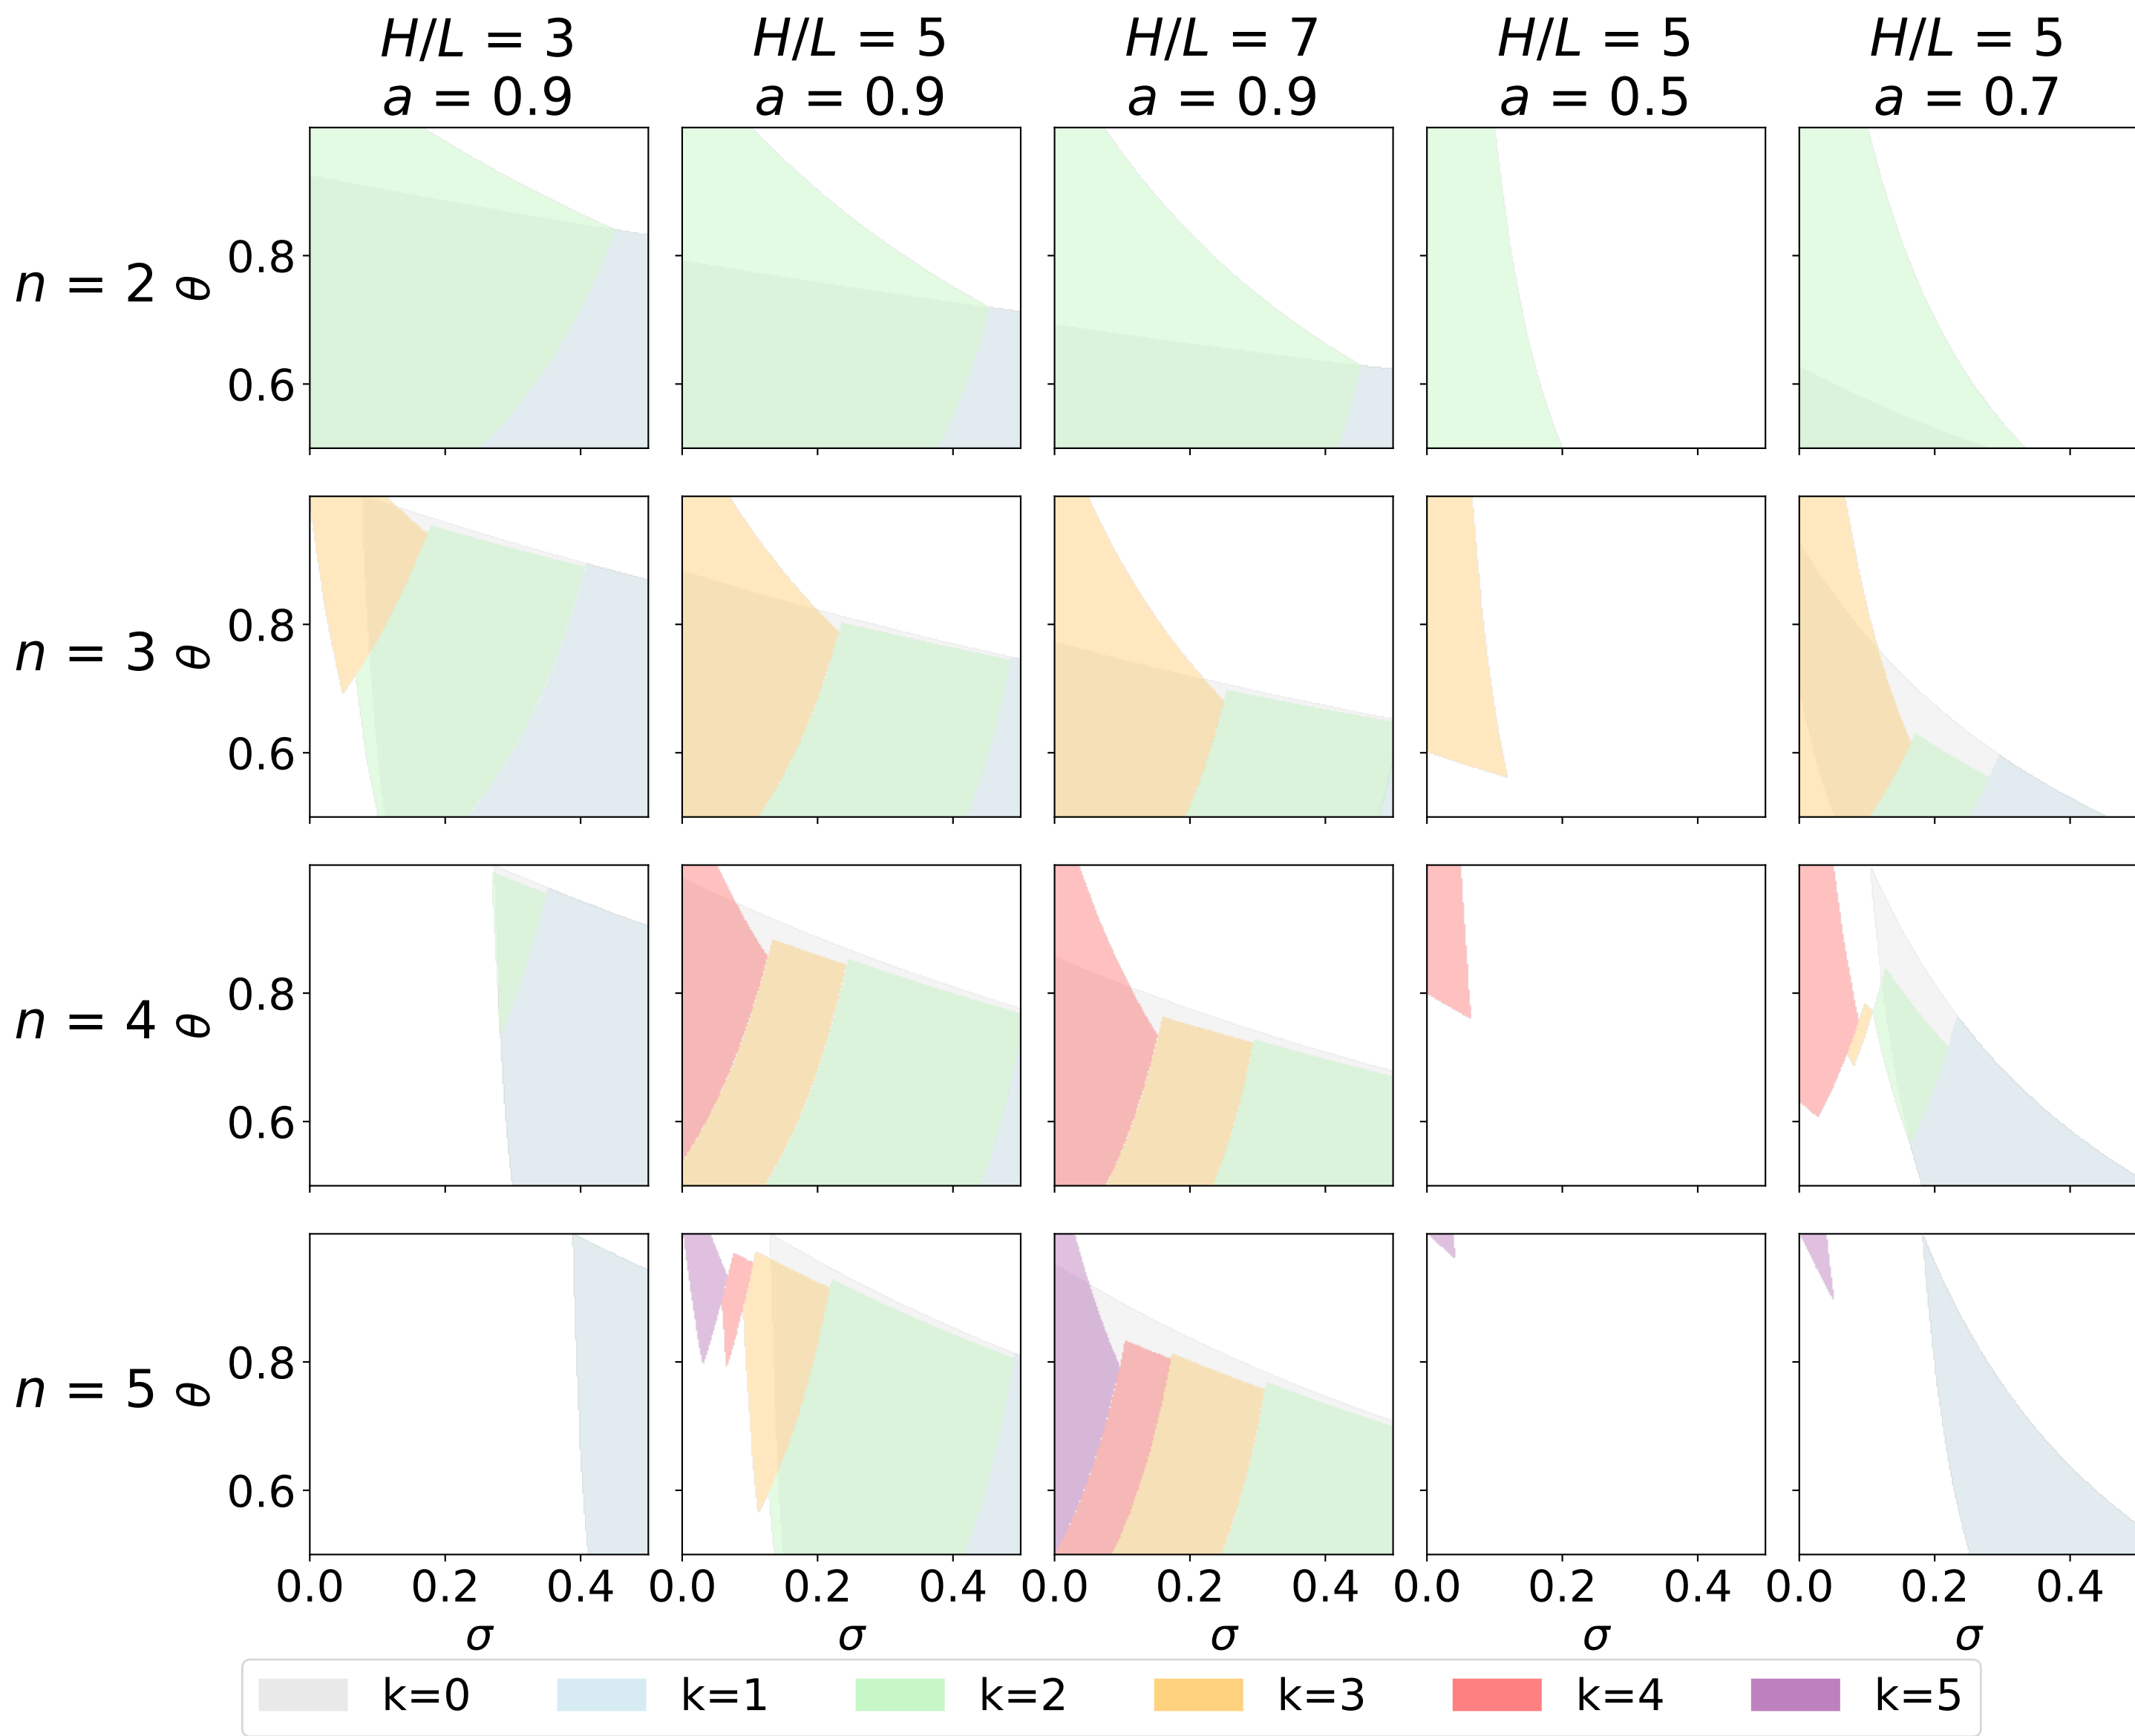

Supplement: supplementary_material [file n_player_game.pdf › save/figs/n_player_game.pdf]
