# Supplementary material
Source: ML conference proceedings conference paper supplement (https://openreview.net/forum?id=aYd4wSCle4)
Supplement: supplementary_material [file prop_theta_util_diff.pdf › save/figs/prop_theta_util_diff.pdf]

↑  $\sigma$  = ↓ Price Sensitivity

$H/L$  = Ratio of High to Low Price

$\theta$  = % Population Willing to Pay  $H$

$\theta = 0.5$

$\theta = 0.75$

$H/L = 2$

$\sigma$

0.8

0.6

$H/L = 4$

$\sigma$

0.8

0.6

0.0

0.1

0.2

0.3

0.4

0.5

$\sigma$

0.0

0.1

0.2

0.3

0.4

0.5

$\sigma$

Independent  
Correlated

0.10

0.05

0.00

-0.05

-0.10
