# Supplementary material
Source: ML conference proceedings conference paper supplement (https://openreview.net/forum?id=aYd4wSCle4)

↑  $\sigma$  = ↓ Price Sensitivity

$H/L$  = Ratio of High to Low Price

$\theta$  = % Population Willing to Pay  $H$

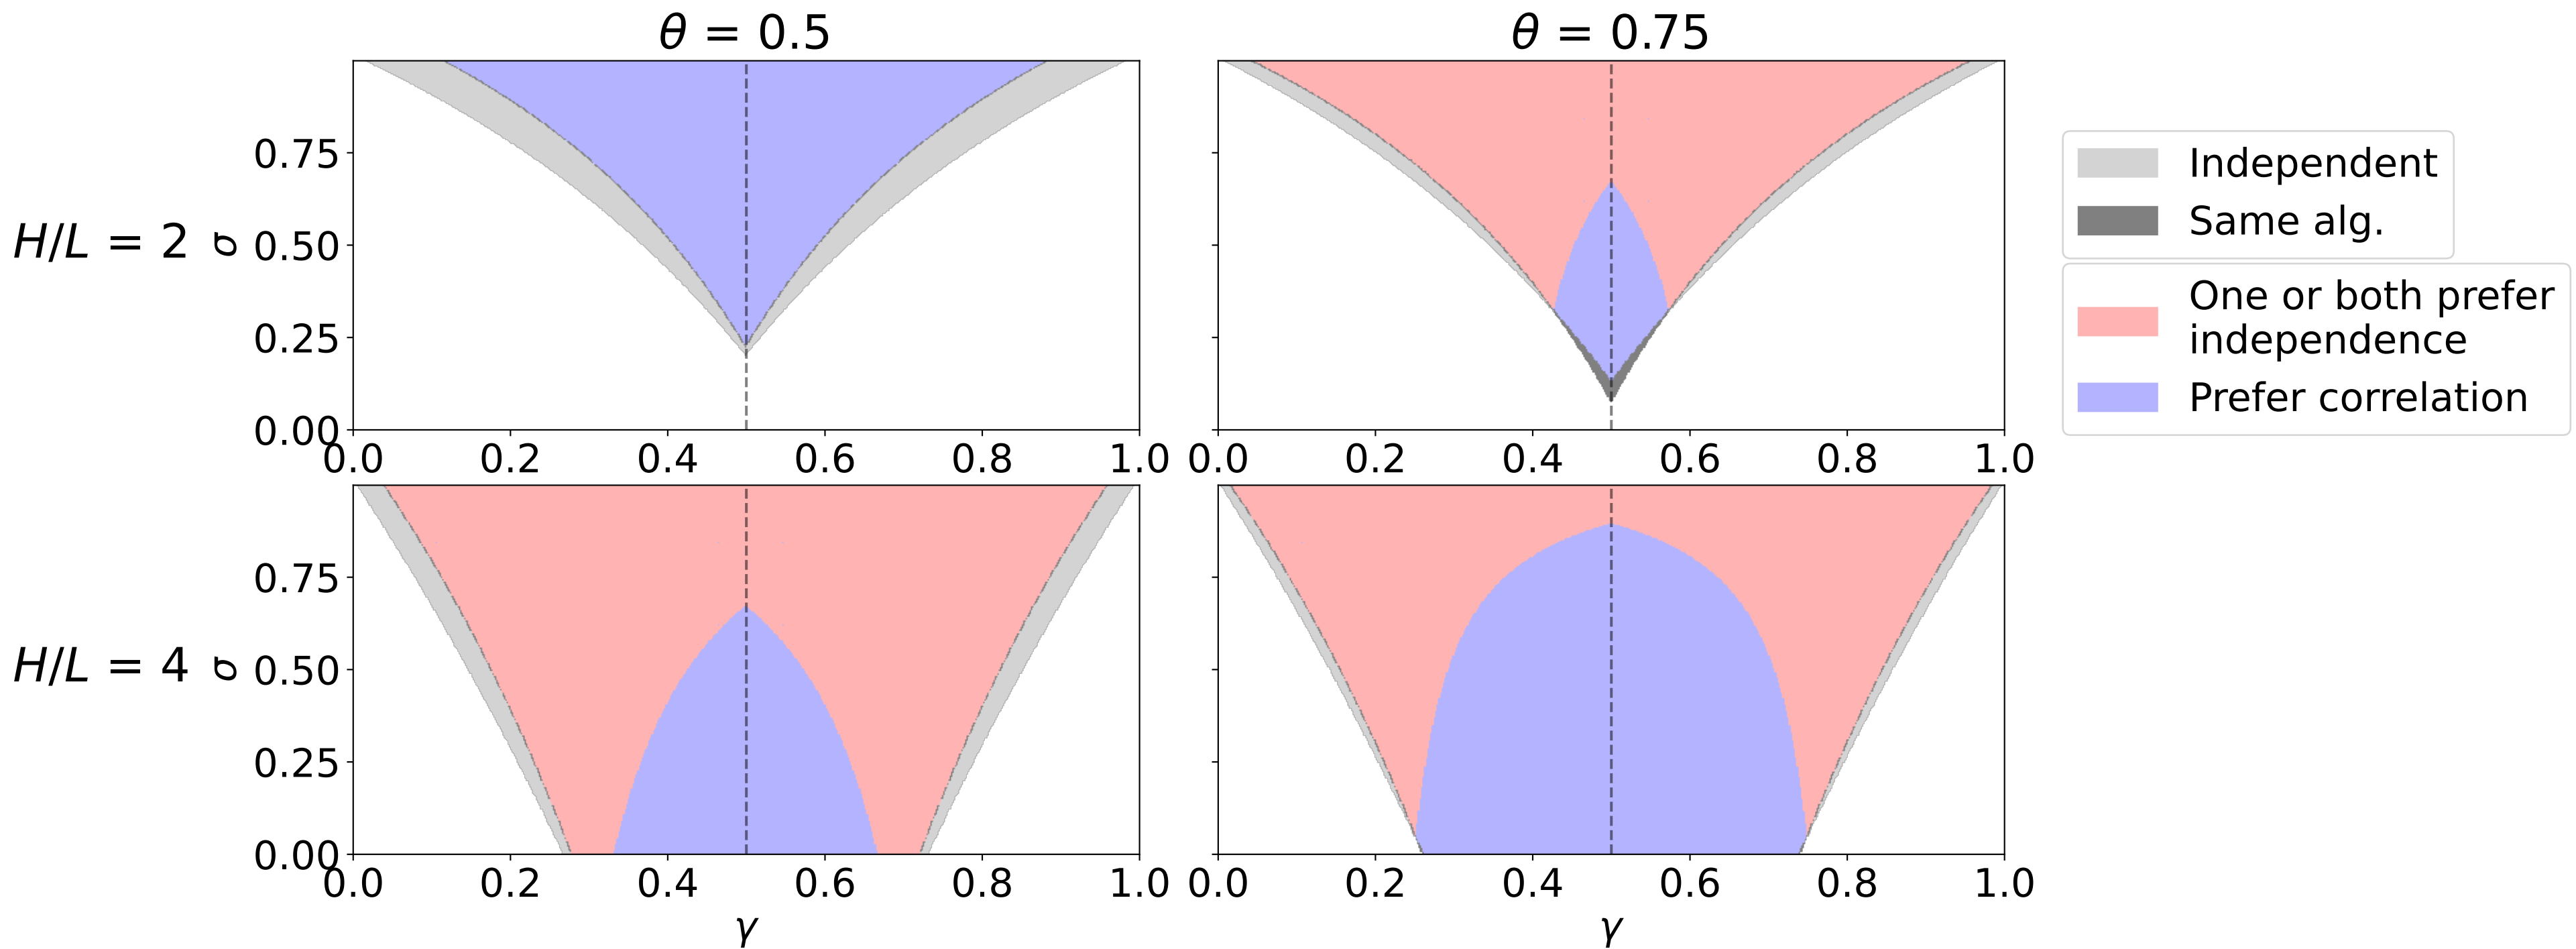

Supplement: supplementary_material [file brand_loyalty.pdf › save/figs/brand_loyalty.pdf]

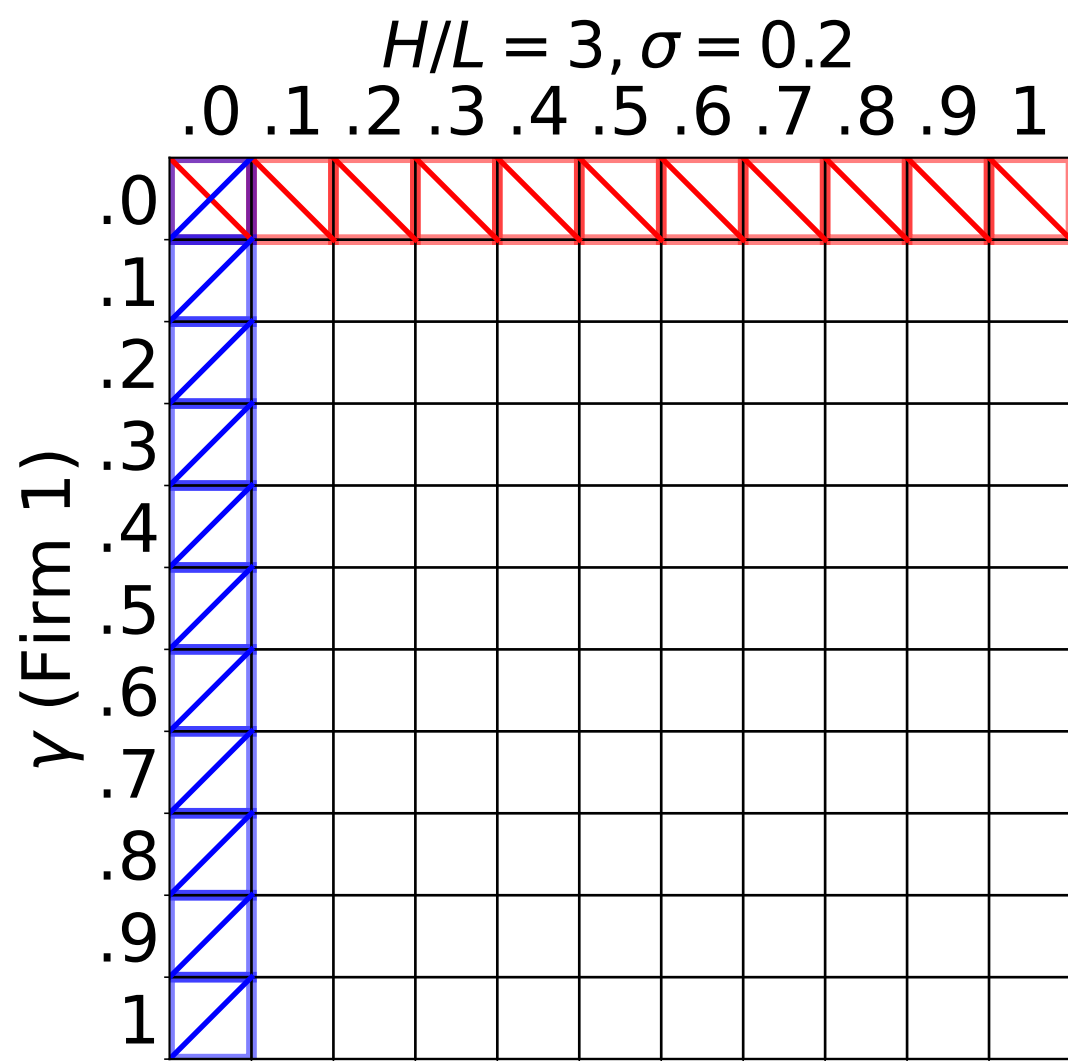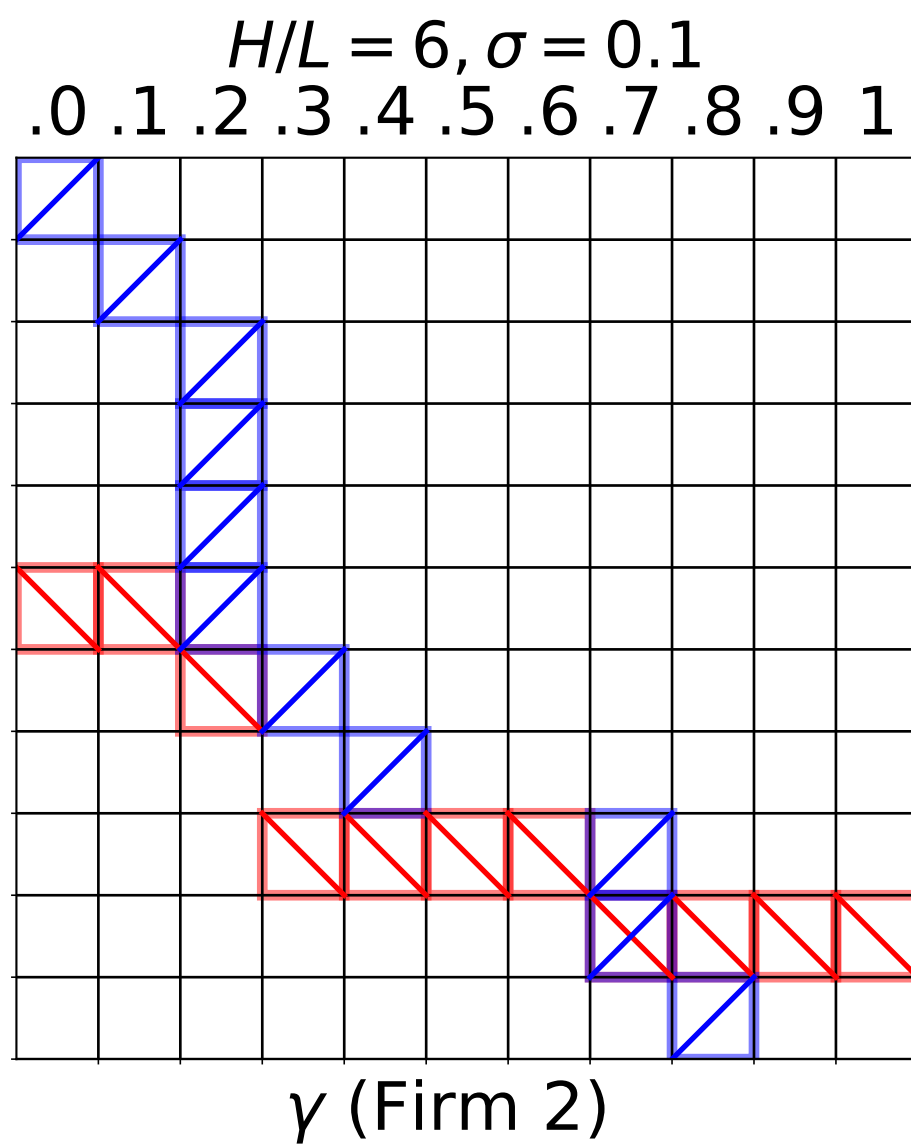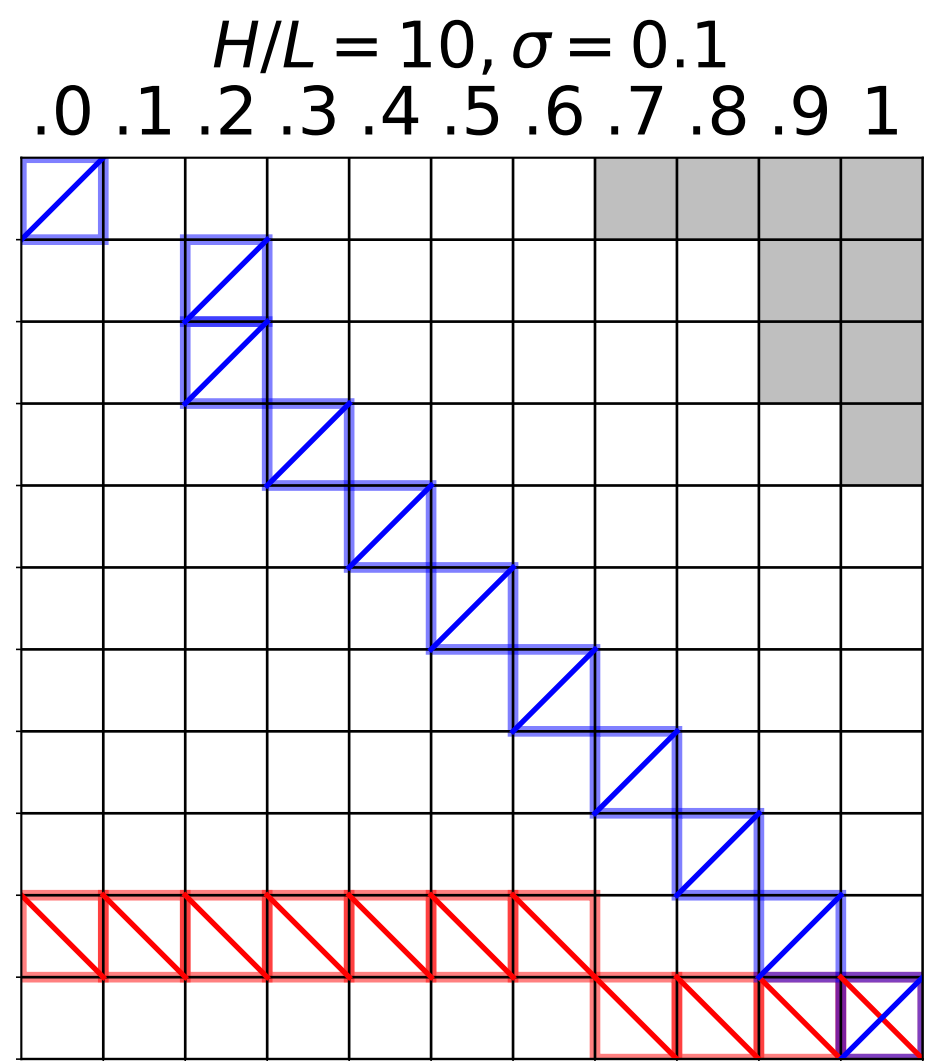

Supplement: supplementary_material [file empirical_eq_selection.pdf › save/figs/empirical_eq_selection.pdf]

**(a)**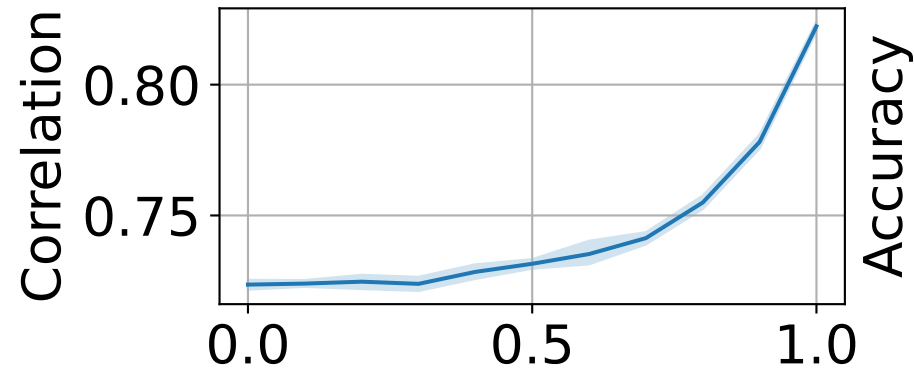

Accuracy

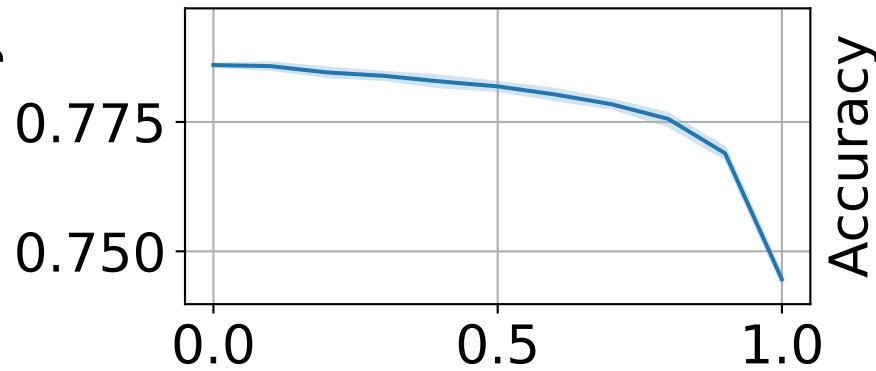

Firm 1

 $\gamma$ 

Firm 2

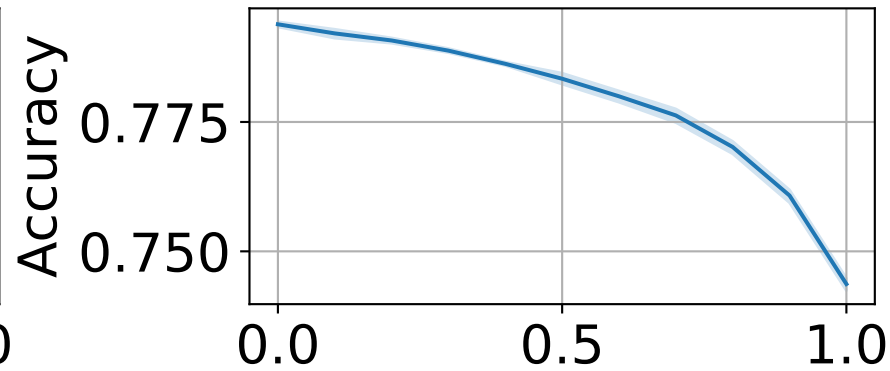

Supplement: supplementary_material [file empirical_metadata.pdf › save/figs/empirical_metadata.pdf]

**(a)**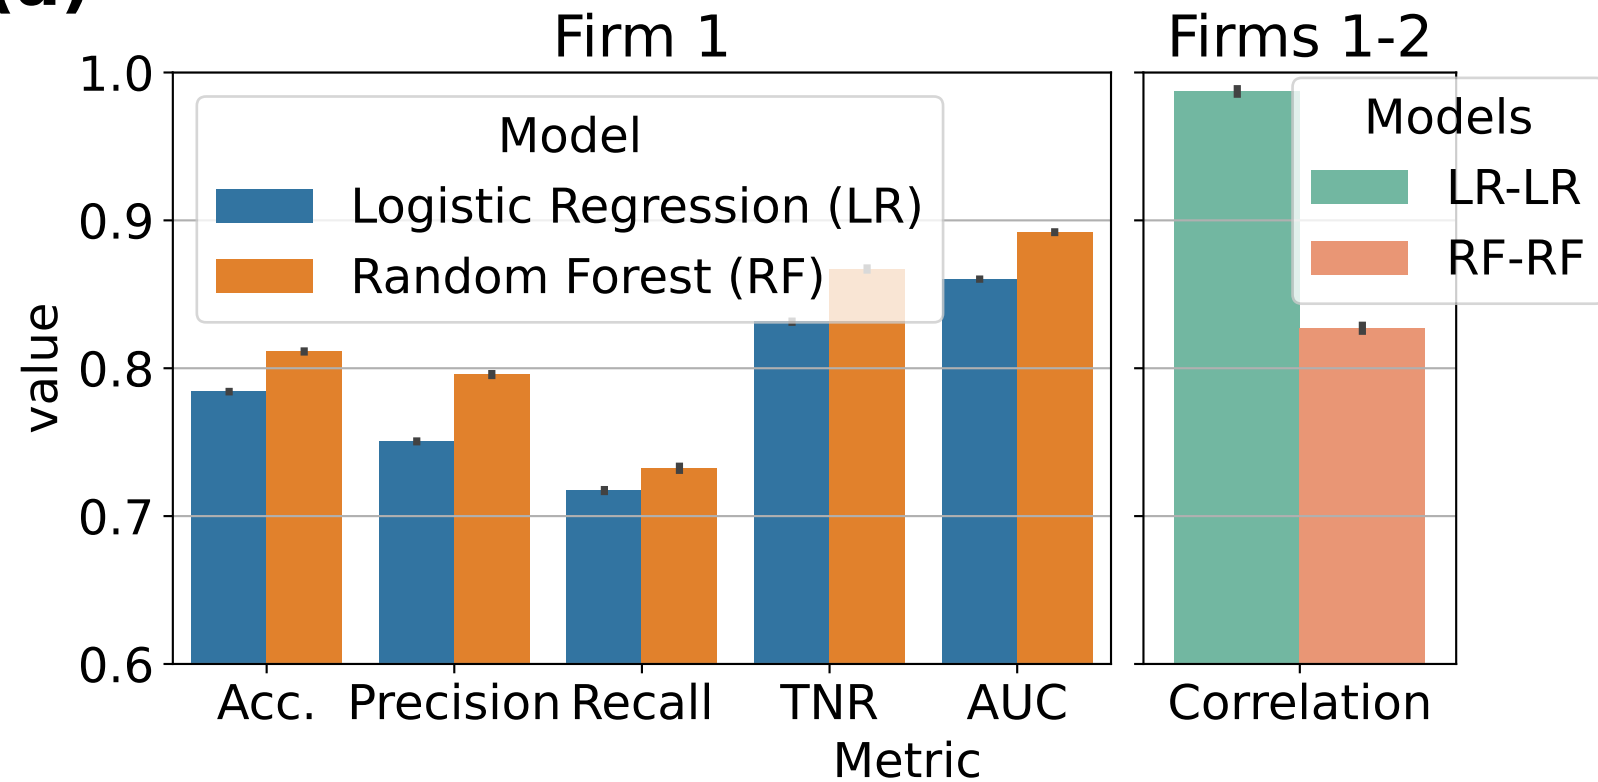**(b)**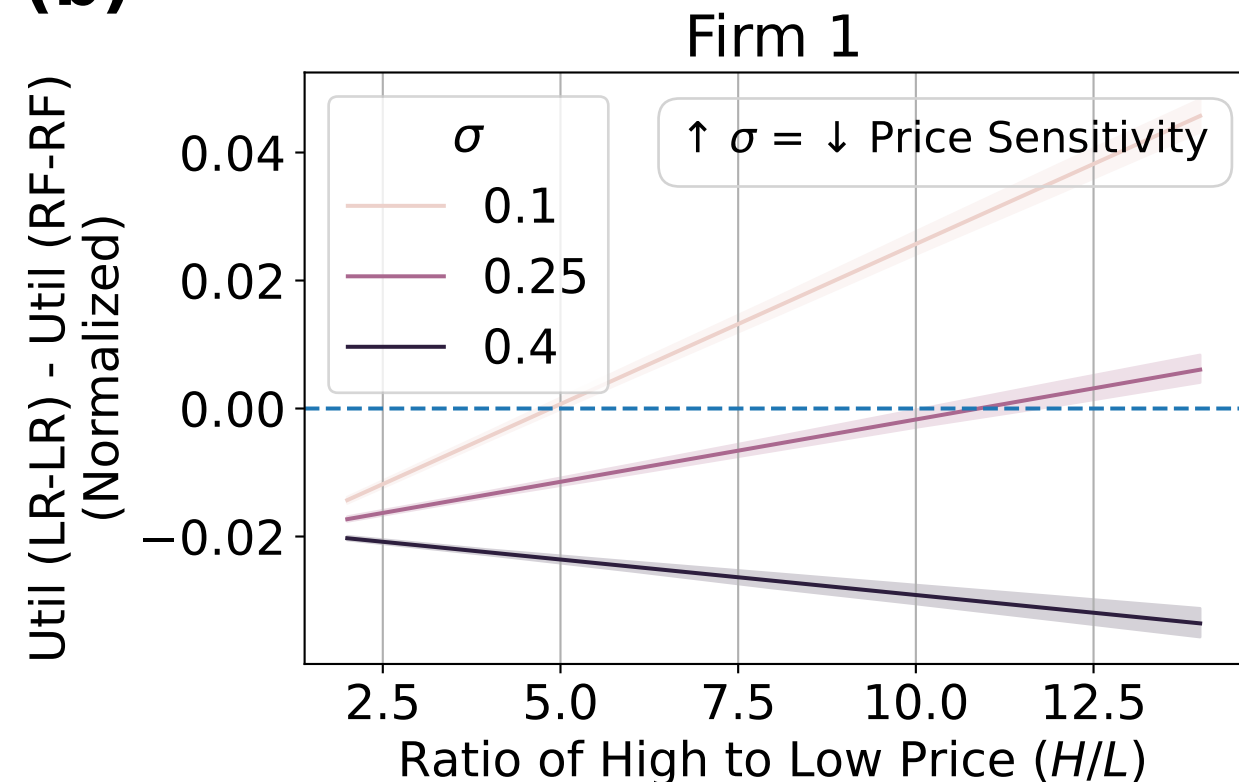

Supplement: supplementary_material [file empirical_models_main.pdf › save/figs/empirical_models_main.pdf]

**(b)** $U(\gamma) - U(\gamma = 0)$  (Normalized)

Firm 1

Firm 2

 $H/L = 2$  $H/L = 3$  $H/L = 5$  $\gamma$  $\sigma$ 

0.2

0.3

0.4

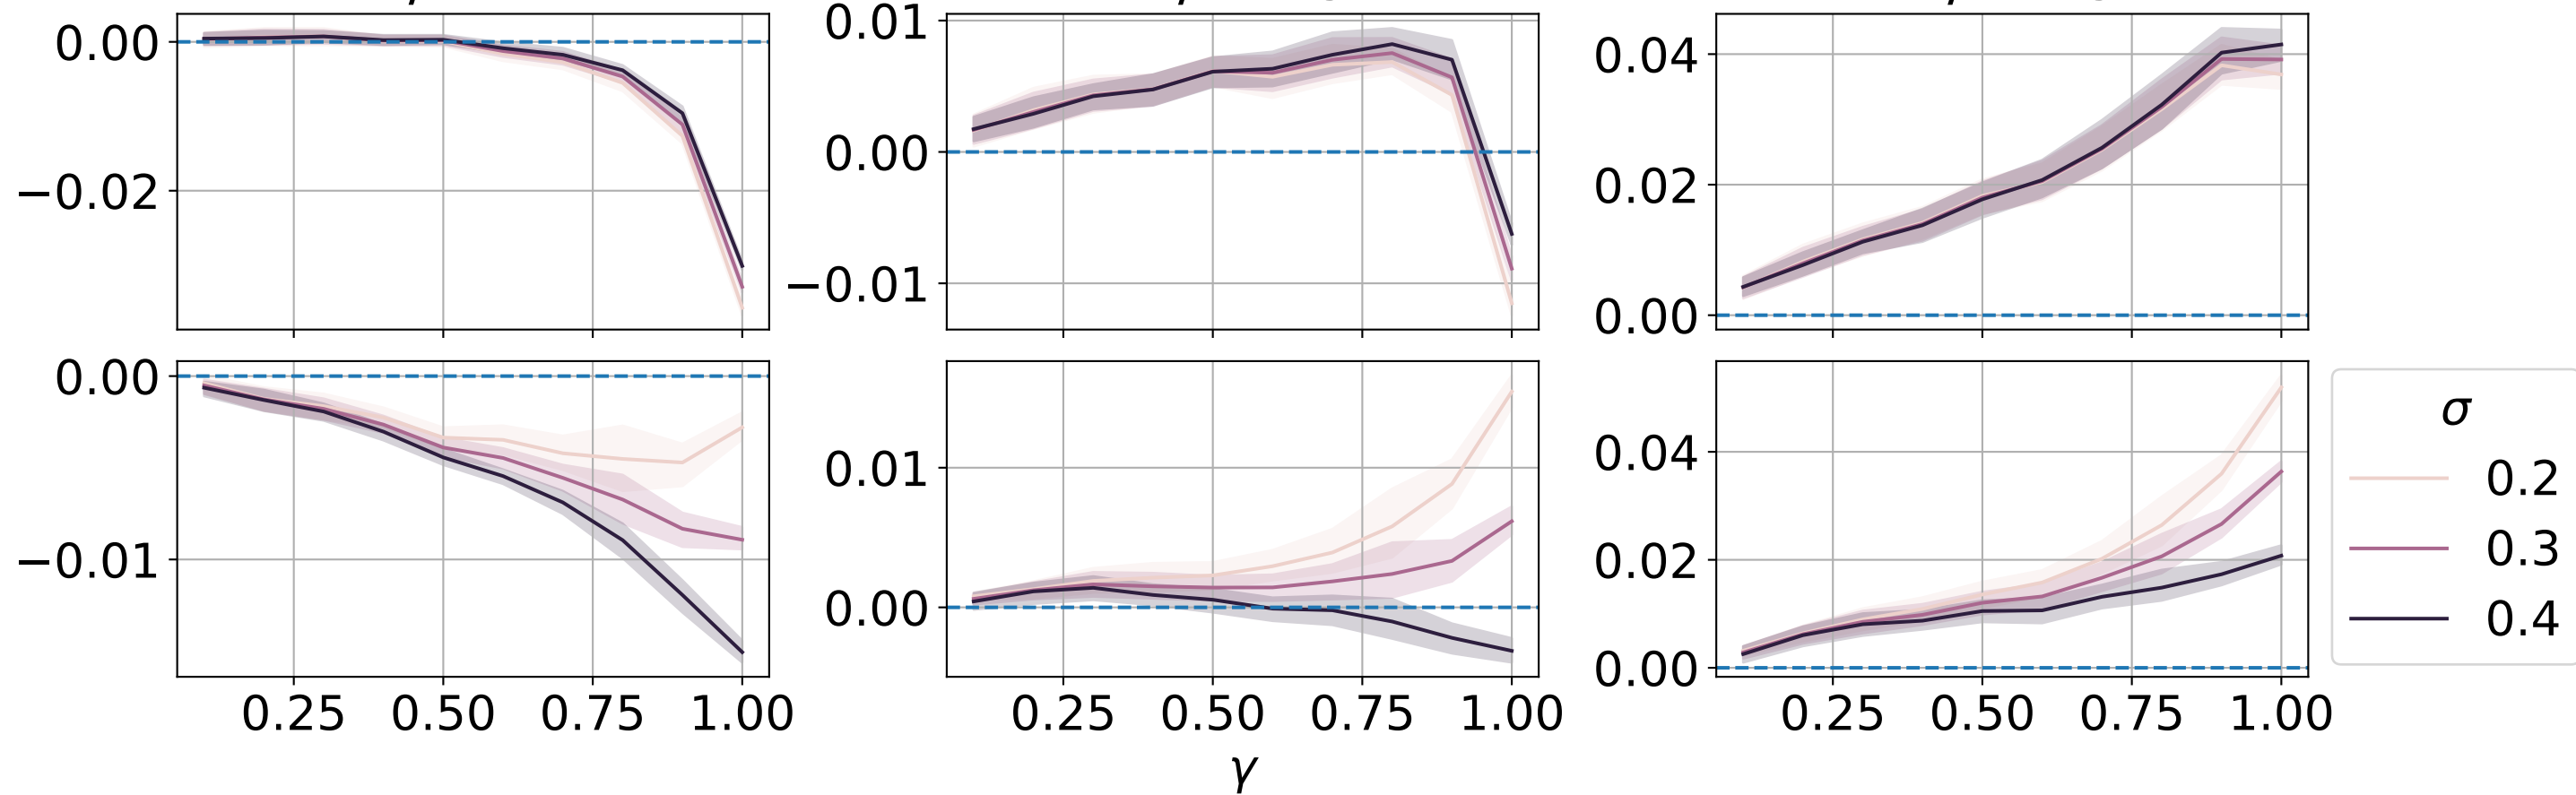

Supplement: supplementary_material [file empirical_util_diff.pdf › save/figs/empirical_util_diff.pdf]
